# Supplementary material
Source: PubMed Central journal article supplement (PMC2785639)

## Supplemental Data :

### **Figure SF1 : Resistance to SDS of the *M. tuberculosis* HN878 (A) and 94-1707 (B) recombinant strains.**

Diamond, HN878:p2952wt and 94-1707:p2952wt; square, HN878:p2952mu and 94-1707:p2952mu; triangle, HN878:pMV361 and 94-1707:pMV361. Strains were used to inoculate 7H9 + ADC supplemented with 0.1% SDS and, after the indicated time of exposure, the number of viable bacteria was evaluated by serial plating on 7H11 + OADC. The values shown are the means  $\pm$  standard deviations of three independent experiments.

Figure SF1

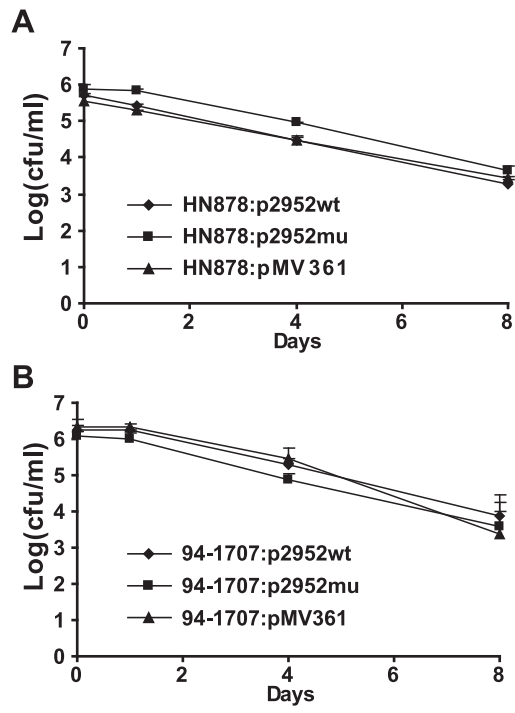

Supplement: supp_M109.041939_jbc.M109.041939-1.pdf [file supp_M109.041939_jbc.M109.041939-1.pdf]
